# Supplementary material for: Stabilizing ultra-close Pt clusters on all-in-one CeO2/Al2O3 fibril-in-tubes against sintering
Source: Royal Society of Chemistry journal article supplement (doi:10.1039/d4sc04001e), 2024-01-01
Supplement: d4sc04001e1.pdf [file d4sc04001e1.pdf]

## Electronic Supplementary Information

# Stabilizing ultra-close Pt clusters on all-in-one CeO<sub>2</sub>/Al<sub>2</sub>O<sub>3</sub> fibril-in-tubes against sintering

*Wanlin Fu,<sup>a</sup> Kuibo Yin,<sup>b</sup> Zhihui Li,<sup>a</sup> Jun Wang,<sup>a</sup> Mingyu Tang,<sup>a</sup> Jilan Tian,<sup>a</sup> Litao Sun,<sup>b</sup> Yueming Sun,<sup>b</sup> and Yunqian Dai<sup>a,\*</sup>*

<sup>a</sup>School of Chemistry and Chemical Engineering, Southeast University, Nanjing, Jiangsu 211189 (China)

<sup>b</sup>SEU-FEI Nano-Pico Center, Key Laboratory of MEMS of Ministry of Education, School of Electronic Science and Engineering, Southeast University, Nanjing, Jiangsu 211189 (China)

\*Correspondence: [daiy@seu.edu.cn](mailto:daiy@seu.edu.cn)

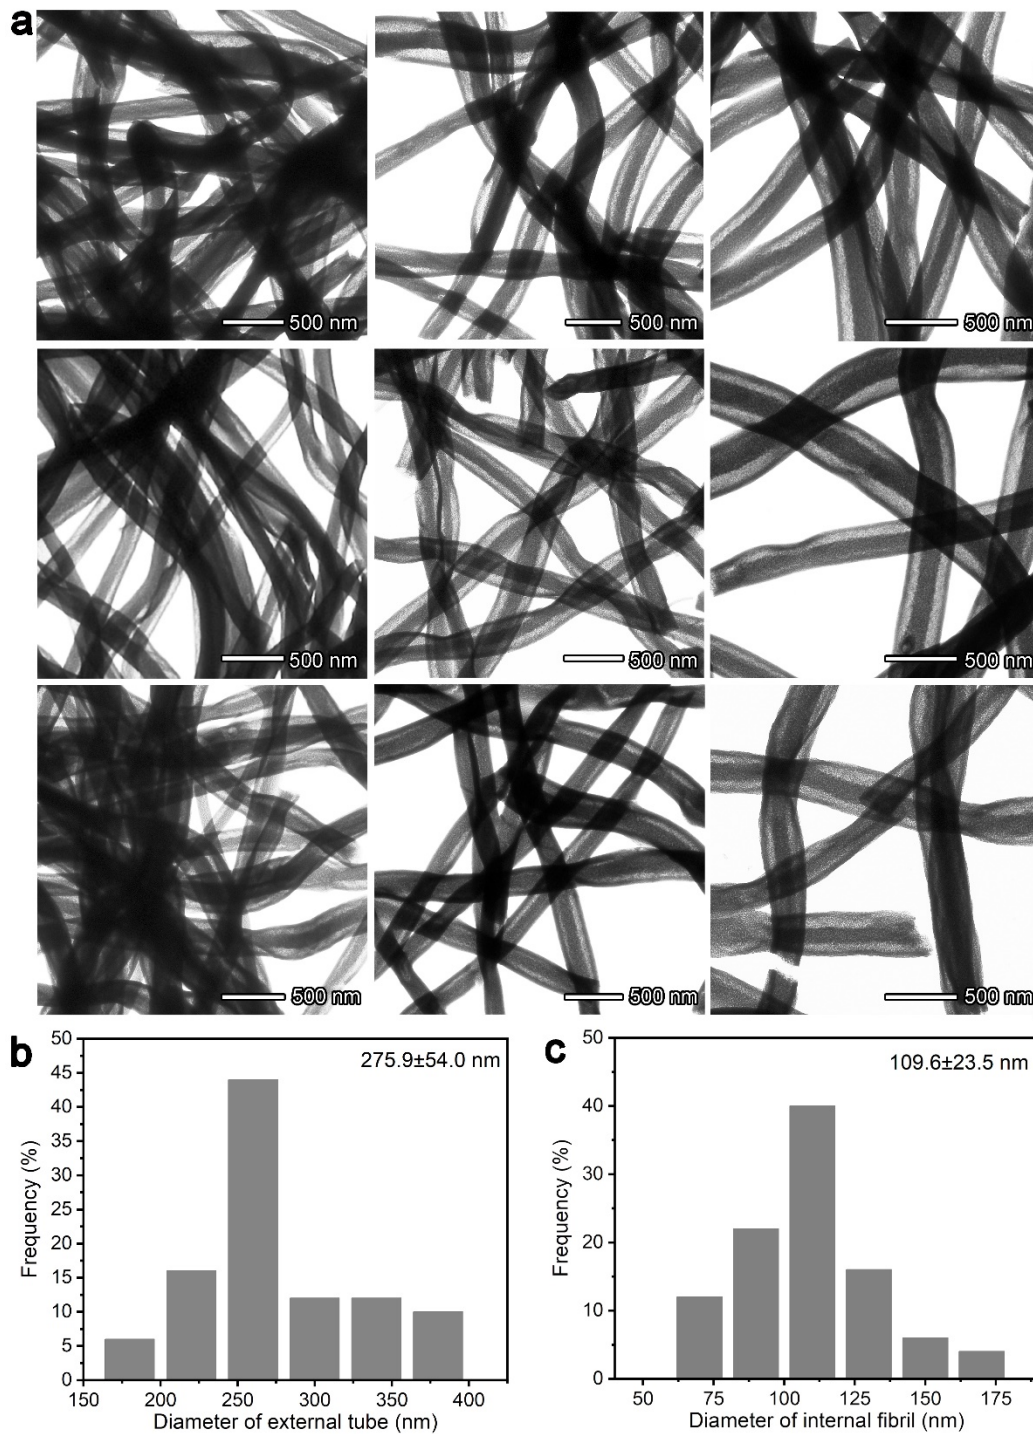

**Fig. S1** (a) TEM images of CeO<sub>2</sub>/Al<sub>2</sub>O<sub>3</sub> fibril-in-tubes at different regions. (b, c) Diameter distribution of the external tube and internal fibril.

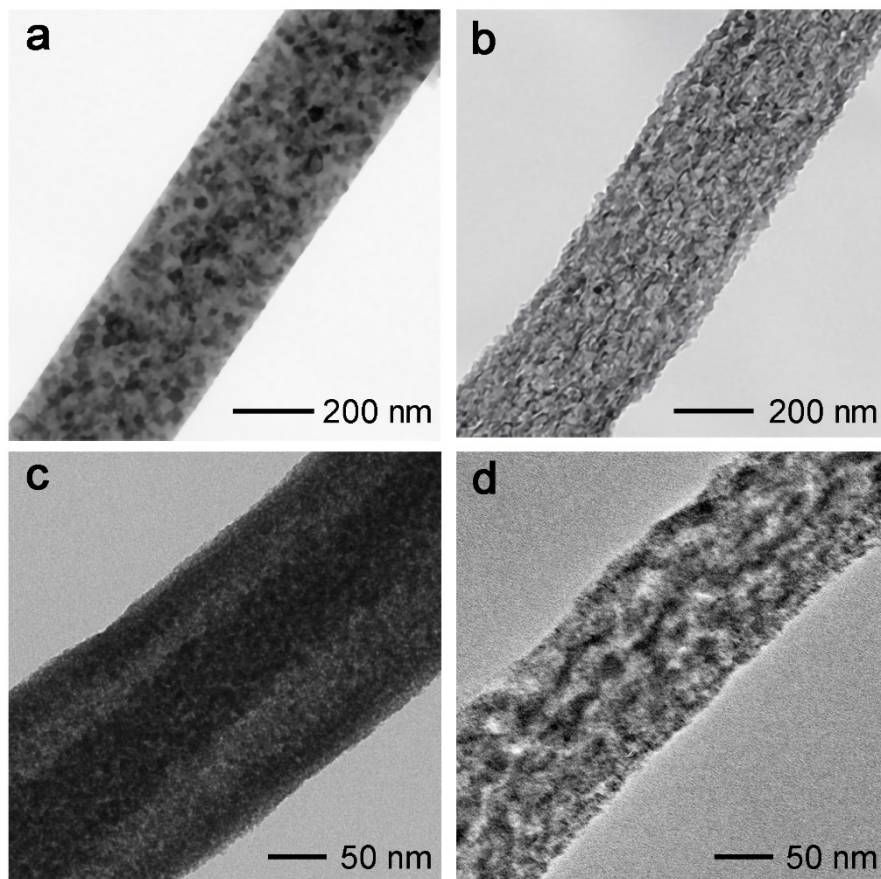

**Fig. S2** TEM images of (a) CeO<sub>2</sub>, (b) Al<sub>2</sub>O<sub>3</sub>, (c) CeO<sub>2</sub>/Al<sub>2</sub>O<sub>3</sub>-2.5, and (d) CeO<sub>2</sub>/Al<sub>2</sub>O<sub>3</sub>-0.8 nanofibers.

**Note for the fabrication of CeO<sub>2</sub>/Al<sub>2</sub>O<sub>3</sub>-2.5 and CeO<sub>2</sub>/Al<sub>2</sub>O<sub>3</sub>-0.8 nanofibers:**

The CeO<sub>2</sub>/Al<sub>2</sub>O<sub>3</sub>-2.5 and CeO<sub>2</sub>/Al<sub>2</sub>O<sub>3</sub>-0.8 nanofibers were prepared by electrospinning a precursor containing 0.087 g (for CeO<sub>2</sub>/Al<sub>2</sub>O<sub>3</sub>-2.5) or 0.267 g (CeO<sub>2</sub>/Al<sub>2</sub>O<sub>3</sub>-0.8) of Al(acac)<sub>3</sub>, 0.3 g of Ce(acac)<sub>3</sub>, 0.4 g of PVP ( $M_w \approx 1.3 \times 10^6$ ), and 6 mL of ethanol with a flow rate of 0.5 mL/h, at 15 kV, followed by calcination at 500 °C for 2 h in air with a ramping rate of 4.2 °C/min. Before electrospinning, the precursor was sonicated for 20 min, to achieve better homogeneity.

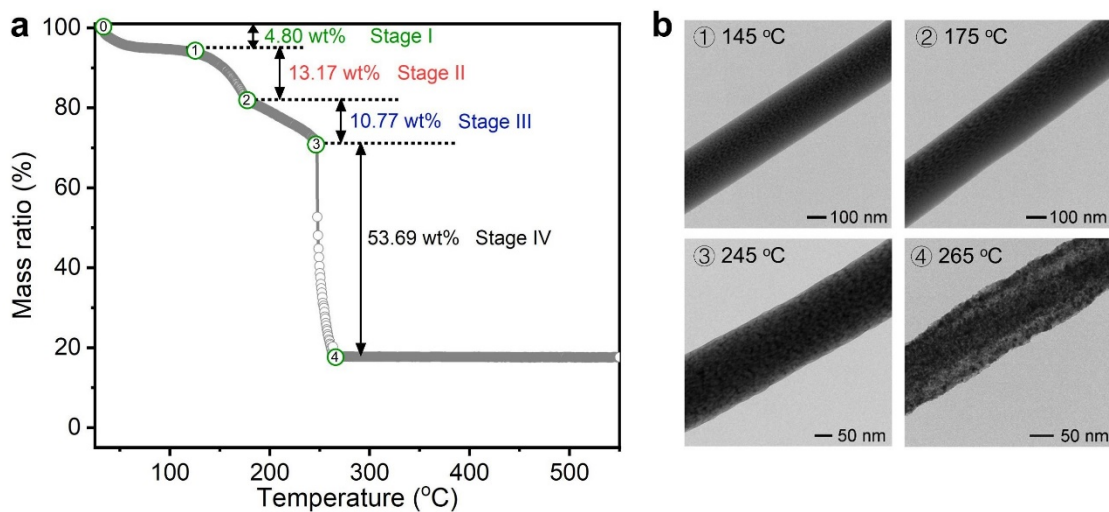

**Fig. S3** (a) TG curves of  $\text{Ce}(\text{acac})_3/\text{Al}(\text{acac})_3/\text{PVP}$  as-spun nanofibers calcined in the air with a ramping rate of  $4.2\text{ }^\circ\text{C}/\text{min}$ . (b) TEM images of  $\text{Ce}(\text{acac})_3/\text{Al}(\text{acac})_3/\text{PVP}$  nanofibers after being calcined in the air at 145, 175, 245, and 265  $^\circ\text{C}$  with a ramping rate of  $4.2\text{ }^\circ\text{C}/\text{min}$ .

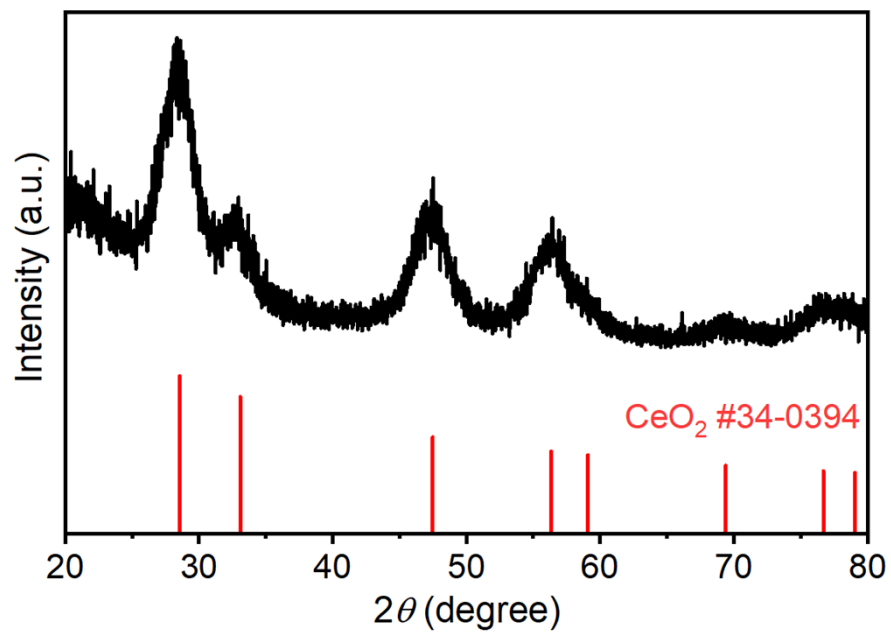

**Fig. S4** X-ray diffraction patterns of the CeO<sub>2</sub>/Al<sub>2</sub>O<sub>3</sub> fibril-in-tubes.

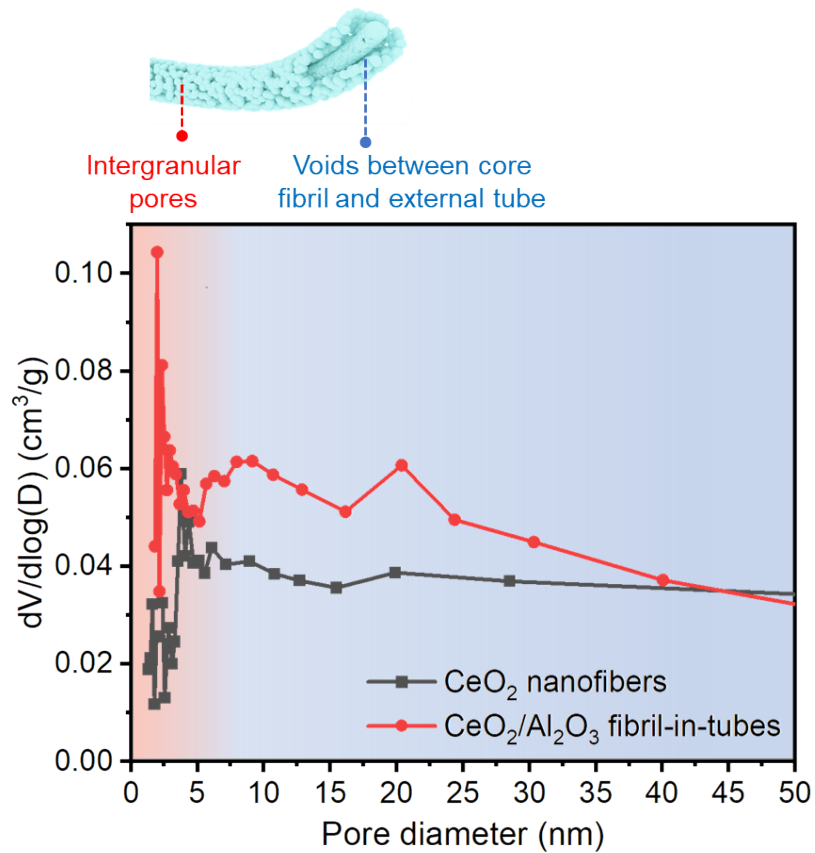

**Fig. S5** Barrett–Joyner–Halenda (BJH) pore size distribution curves of CeO<sub>2</sub>/Al<sub>2</sub>O<sub>3</sub> fibril-in-tubes and pure CeO<sub>2</sub> nanofibers.

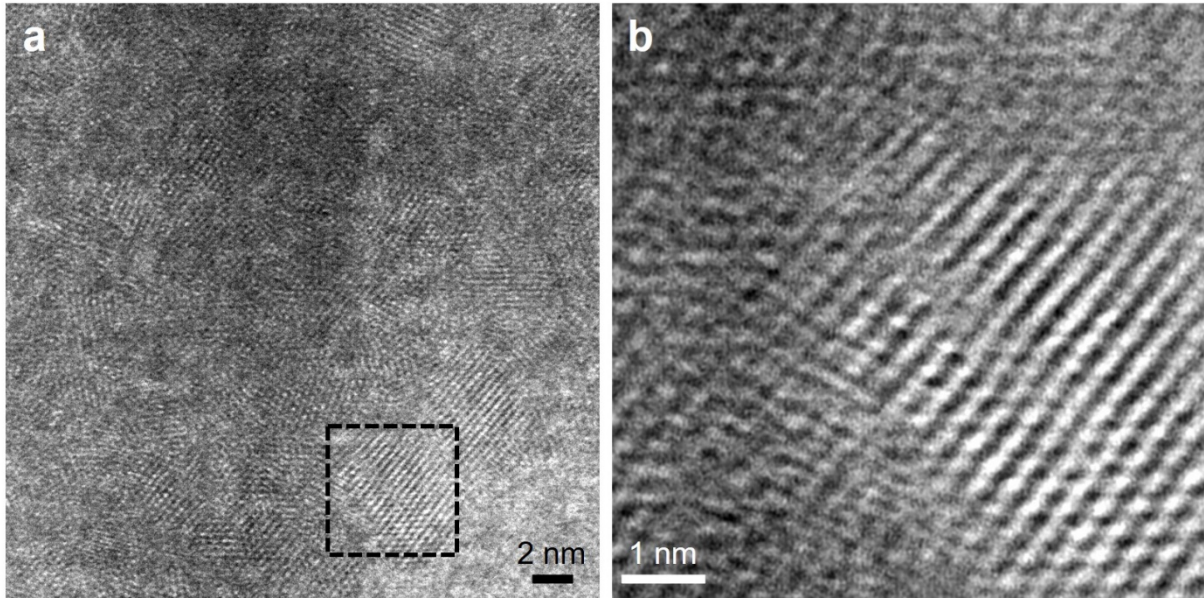

**Fig. S6** (a) HRTEM image of the cross-section of  $\text{CeO}_2/\text{Al}_2\text{O}_3$  nanofibers. (b) The corresponding inverse-FFT image of the squared area in a.

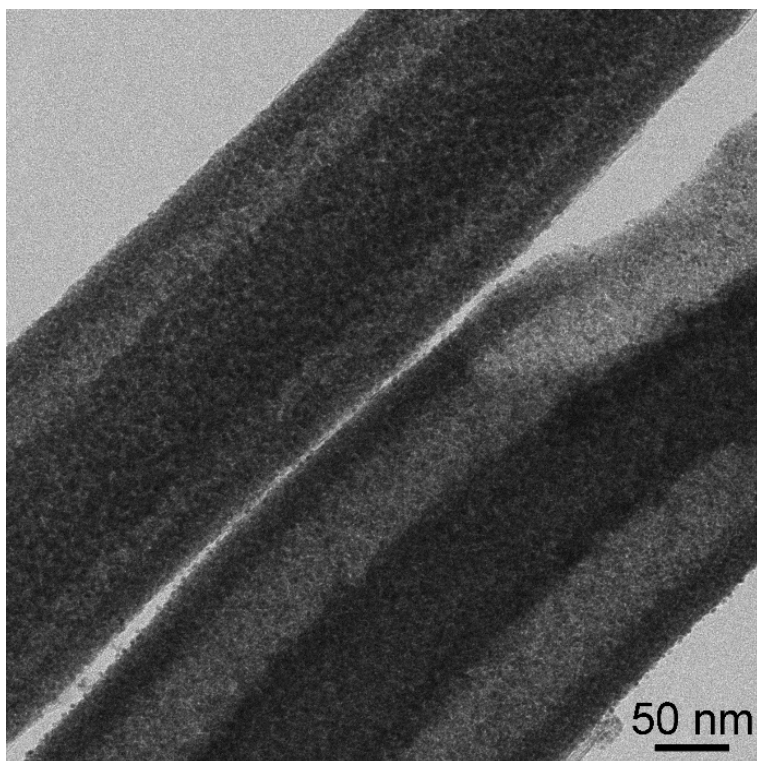

**Fig. S7** TEM image of as-prepared Pt@CeO<sub>2</sub>/Al<sub>2</sub>O<sub>3</sub> fibril-in-tubes.



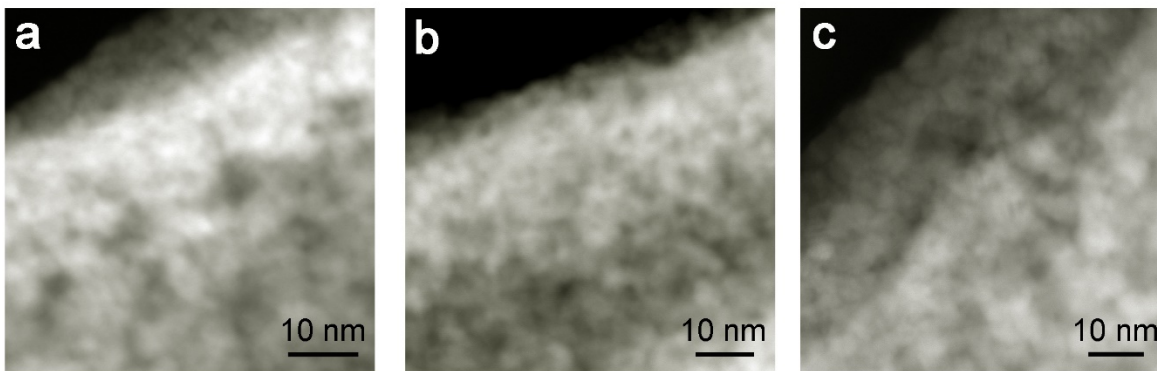

**Fig. S8** High-magnification HAADF-STEM images of Pt@CeO<sub>2</sub>/Al<sub>2</sub>O<sub>3</sub> fibril-in-tubes after being aged (a) in dry air at 700 °C for 2 h, (b) in humid air (10 vol% of water) at 700 °C for 2 h, and (c) in dry air at 750 °C for 10 h. The HAADF-STEM images were colored for a better demonstration.

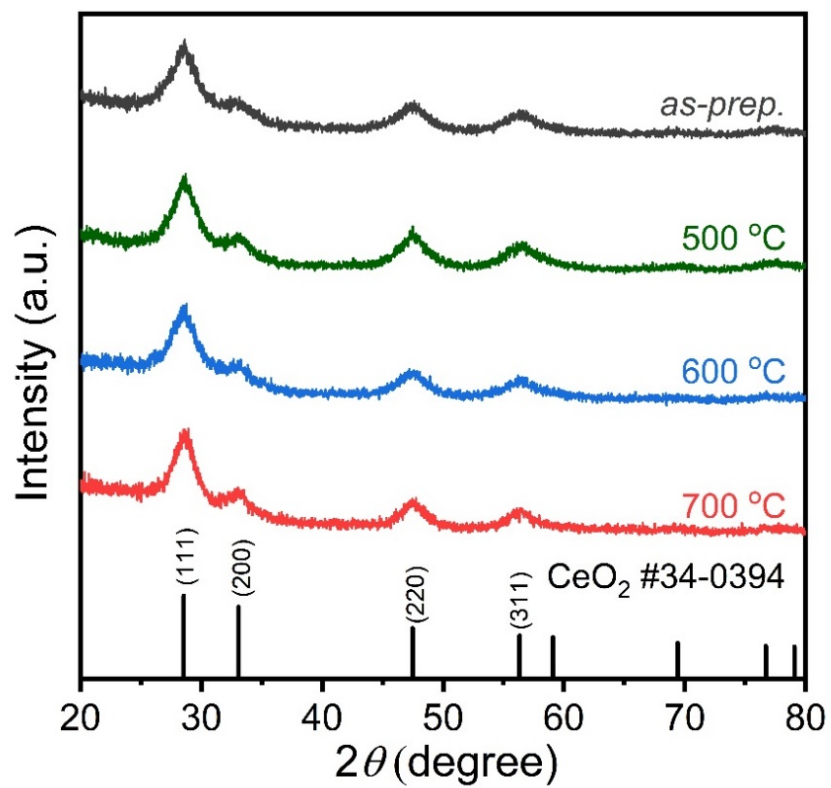

**Fig. S9** XRD patterns of Pt@CeO<sub>2</sub>/Al<sub>2</sub>O<sub>3</sub> before and after aging at 500, 600, and 700 °C for 2 h in air.

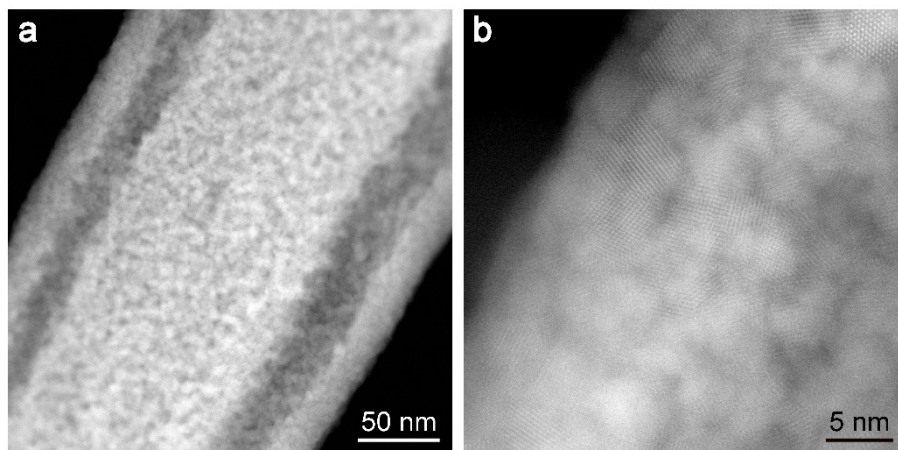

**Fig. S10** AC-HAADF-STEM images of Pt@CeO<sub>2</sub>/Al<sub>2</sub>O<sub>3</sub> after aging at 750 °C for 10 h in air.

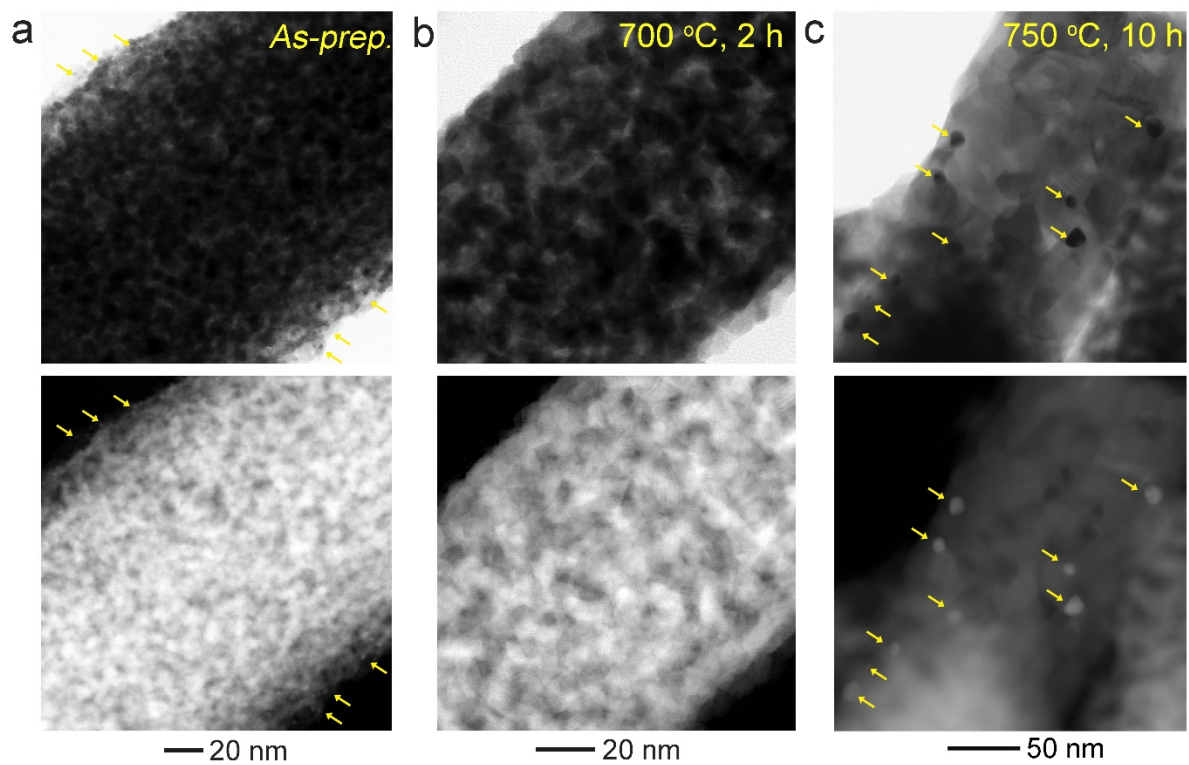

**Fig. S11** TEM (top) and HAADF-STEM (bottom) images of Pt@CeO<sub>2</sub> nanofibers. (a) As-prepared Pt@CeO<sub>2</sub> nanofibers. (b) Pt@CeO<sub>2</sub> nanofibers after being aged at 700 °C for 2 h in the air. (c) Pt@CeO<sub>2</sub> nanofibers after being aged at 750 °C for 10 h in the air. The yellow arrows in a and c highlight the Pt species.

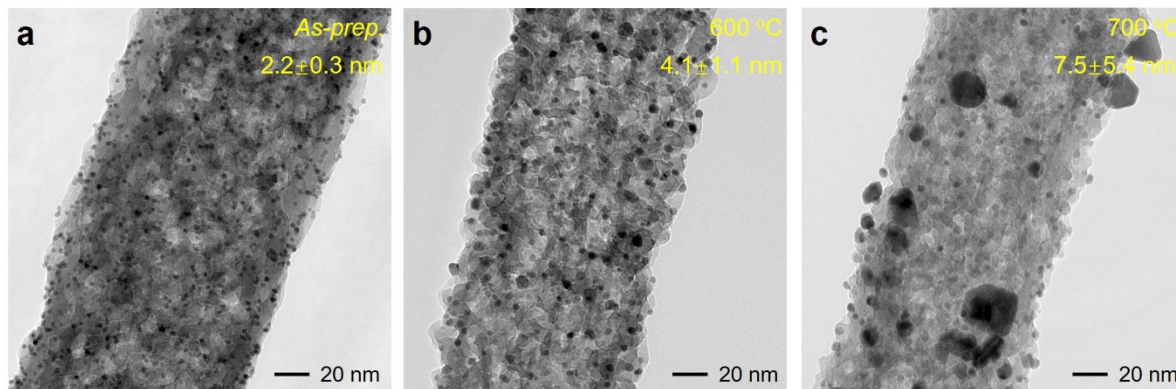

**Fig. S12** TEM images of Pt@Al<sub>2</sub>O<sub>3</sub> nanofibers (a) before and after being aged at (b) 600 °C and (c) 700 °C in the air for 2 h.

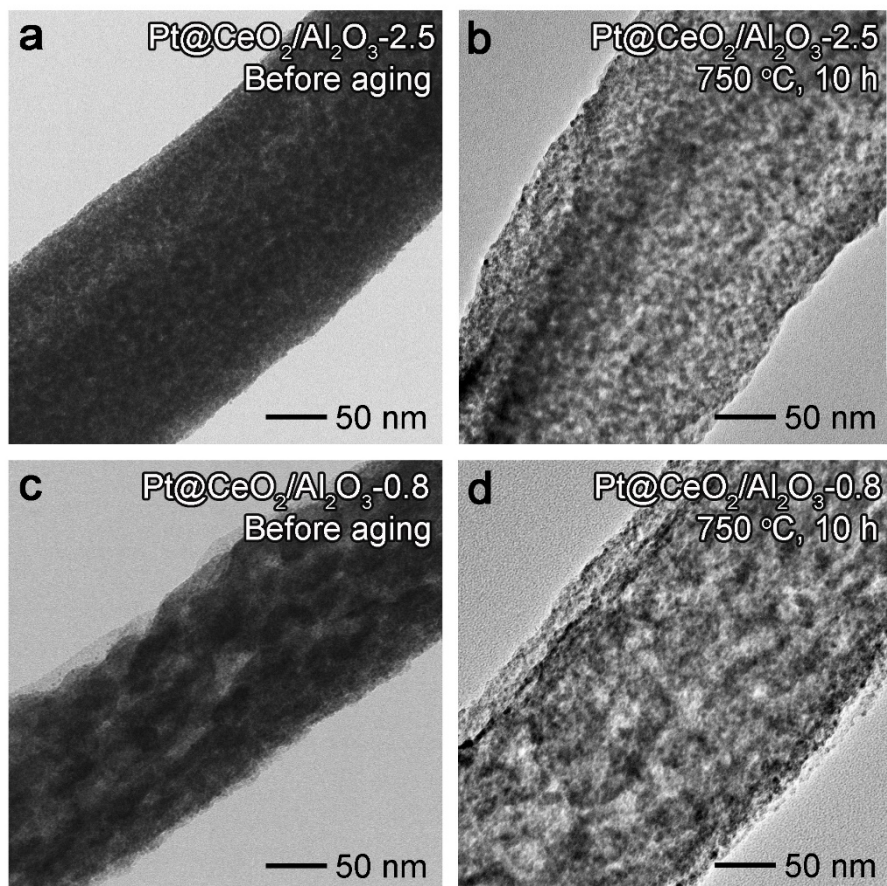

**Fig. S13** TEM images of Pt@CeO<sub>2</sub>/Al<sub>2</sub>O<sub>3</sub>-2.5 nanofibers (a) before and (b) after being severely aged at 750 °C in the air for 10 h. TEM images of Pt@CeO<sub>2</sub>/Al<sub>2</sub>O<sub>3</sub>-0.8 nanofibers (c) before and (d) after being severely aged at 750 °C in the air for 10 h.

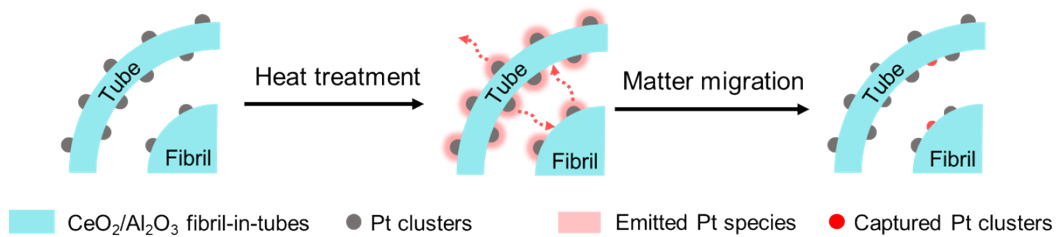

**Fig. S14** Schematic illustration of the suppressed leaching on CeO<sub>2</sub>/Al<sub>2</sub>O<sub>3</sub> fibril-in-tubes.

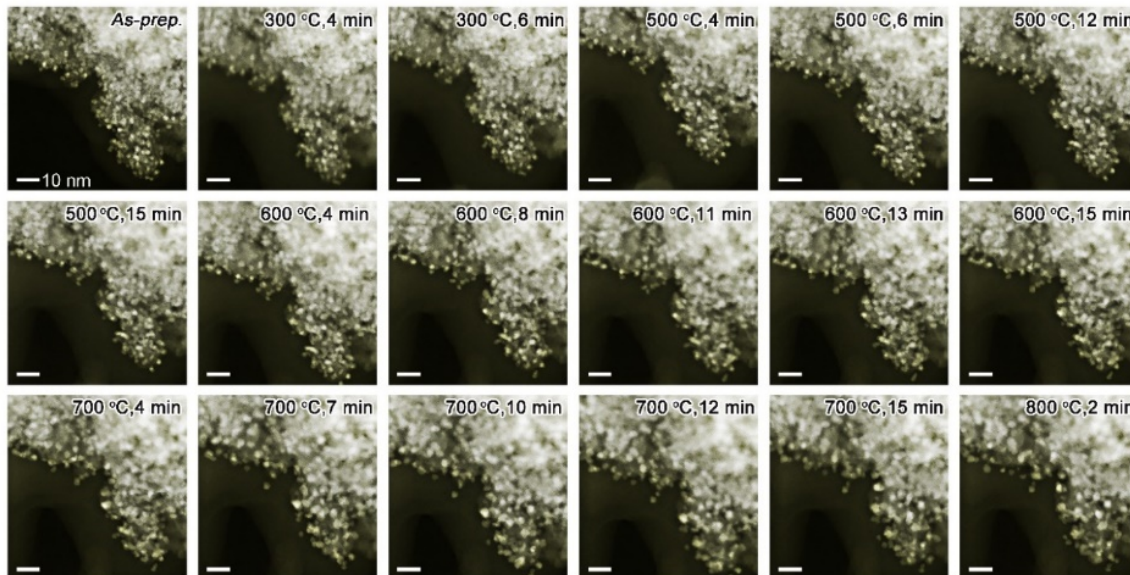

**Fig. S15** Zoom-in HAADF-STEM images of the dashed box in Fig. 4a. All the scale bars indicate 10 nm. The HAADF-STEM images were colored for a better demonstration.



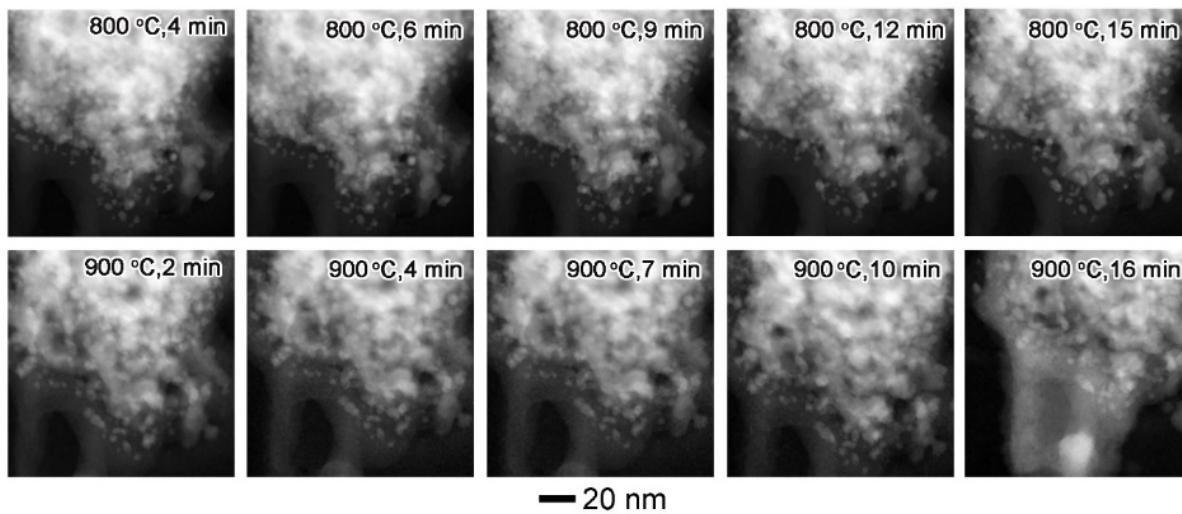

**Fig. S16** *In situ* HAADF-STEM observation on Pt@CeO<sub>2</sub>/Al<sub>2</sub>O<sub>3</sub> fibril-in-tubes at 800 and 900 °C.

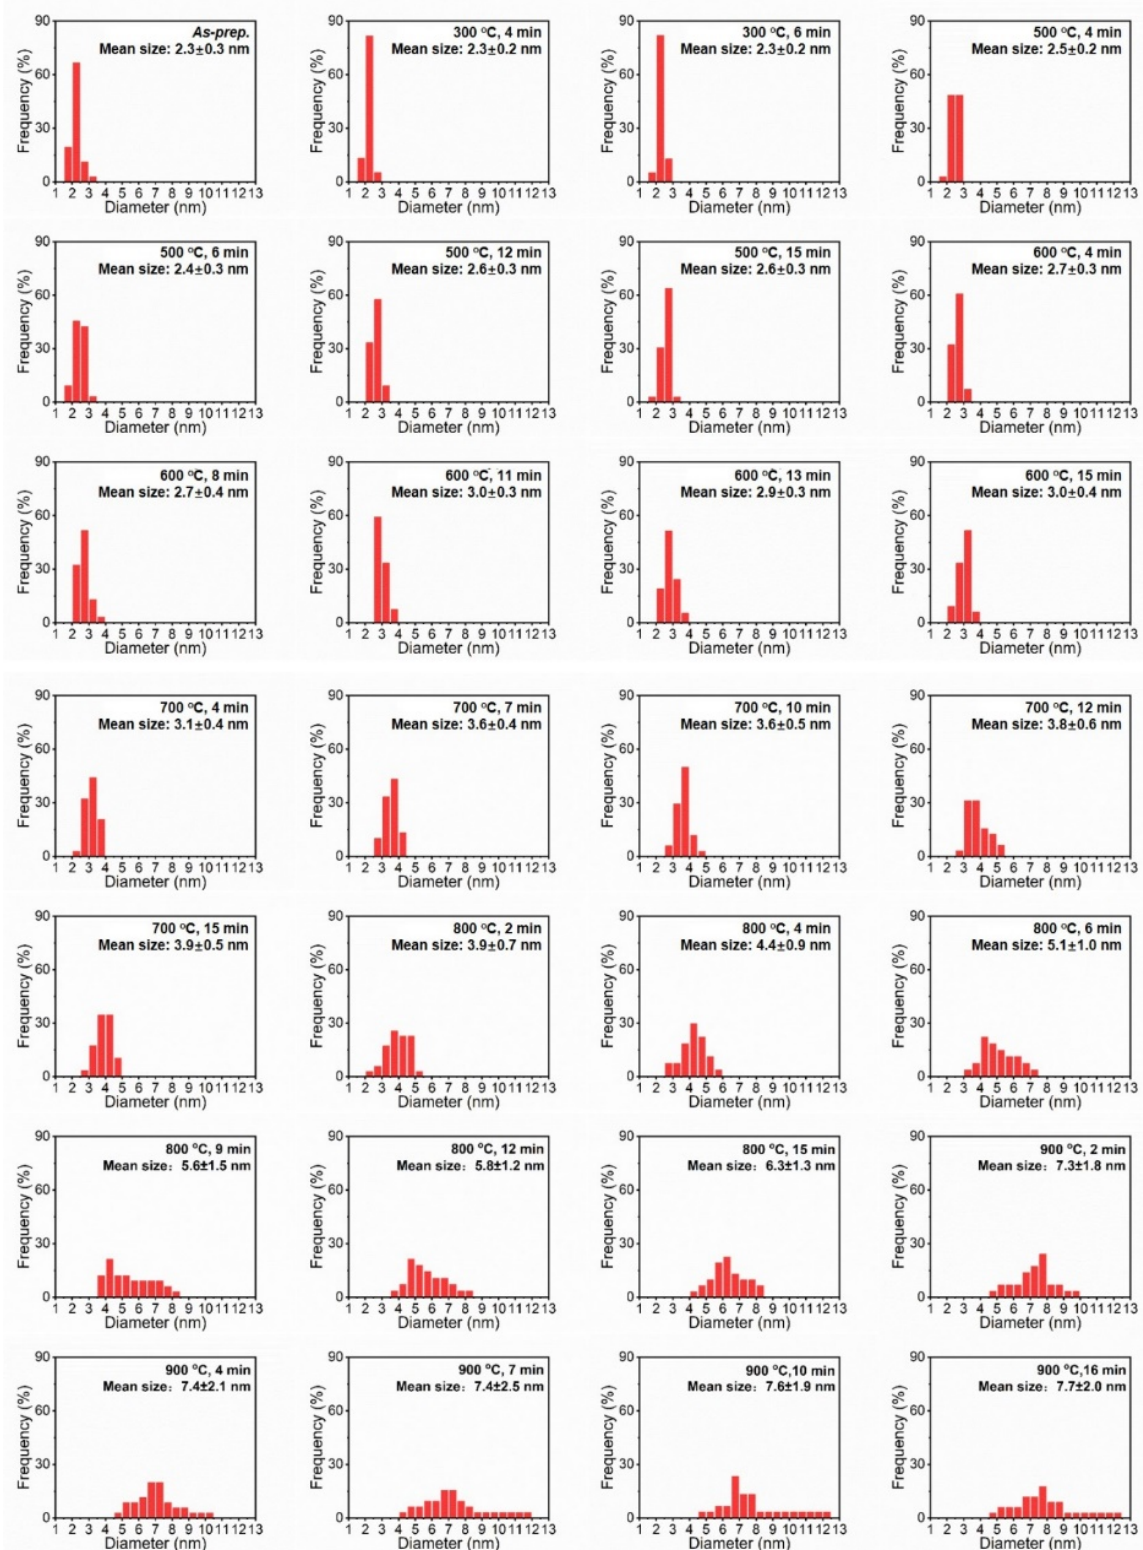

**Fig. S17** Pt size distributions based on the corresponding *in situ* HAADF-STEM images.

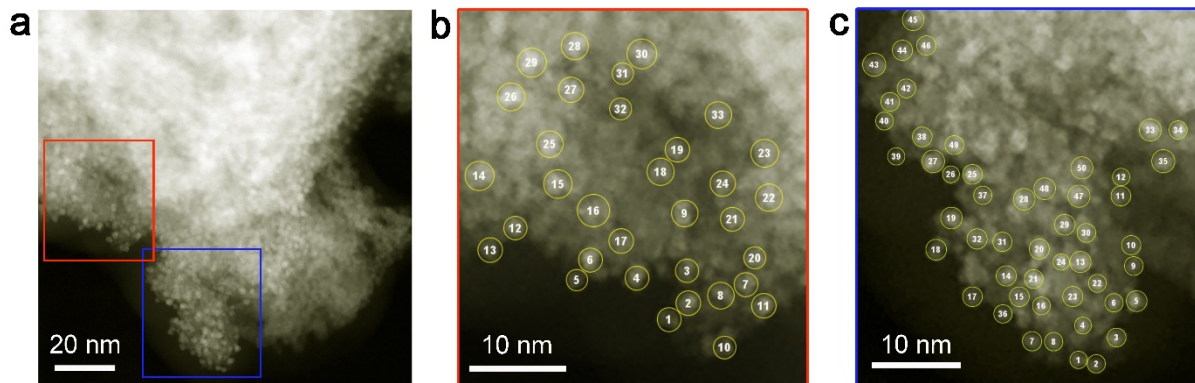

**Fig. S18** Labeled Pt clusters with the aid of Image J, to accurately measure the average neighboring distance. In specific, the nearest neighboring distance was obtained by taking the minimum value of the distance between one cluster and any other cluster. The HAADF-STEM images were colored for a better demonstration.

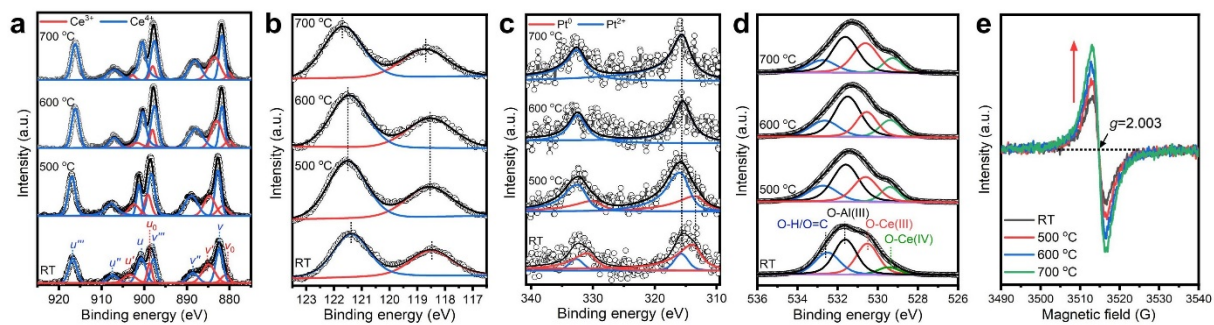

**Fig. S19** (a–d) Ce 3*d*, Al 2*s*, Pt 4*d*, and O 1*s* high-resolution XPS spectra of Pt@CeO<sub>2</sub>/Al<sub>2</sub>O<sub>3</sub>. (e)

EPR spectra of Pt@CeO<sub>2</sub>/Al<sub>2</sub>O<sub>3</sub> fibril-in-tubes before and after aging at 500, 600, and 700 °C.

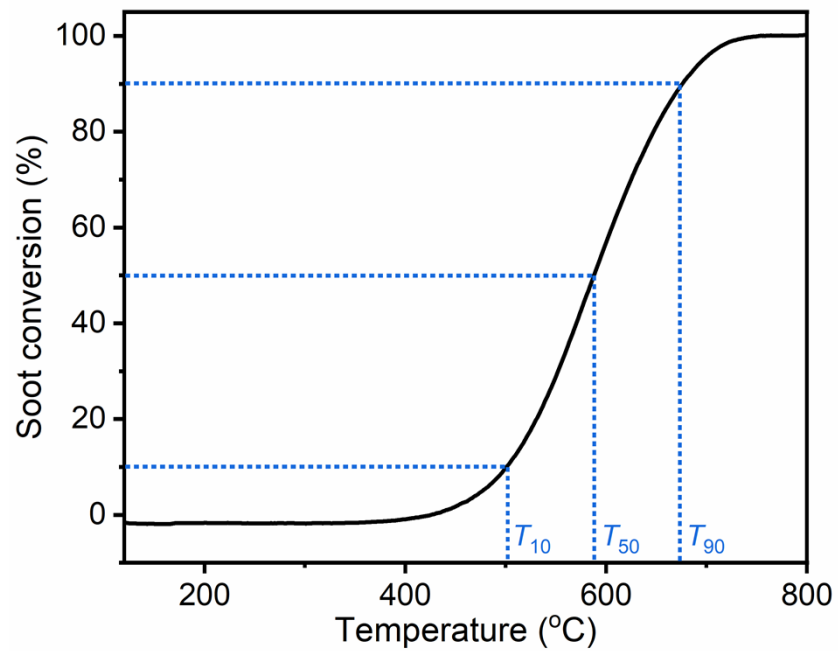

**Fig. S20** Soot conversion without catalyst at a ramping rate of 10 °C/min.

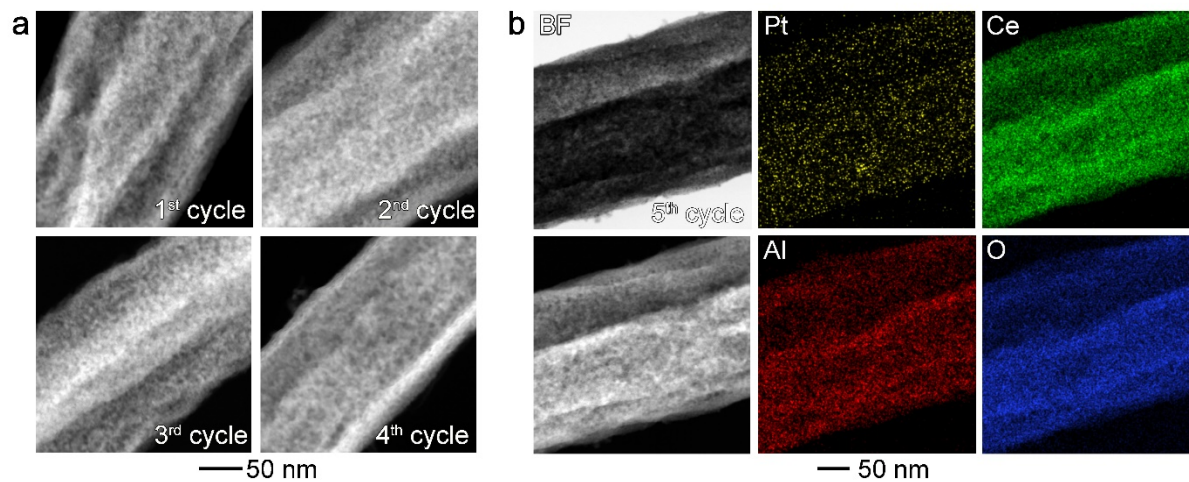

**Fig. S21** (a) HAADF-STEM images of Pt@CeO<sub>2</sub>/Al<sub>2</sub>O<sub>3</sub> after four cycles of soot combustion. (b) TEM, HAADF-STEM, and elemental mappings of Pt@CeO<sub>2</sub>/Al<sub>2</sub>O<sub>3</sub> after the fifth cycle of soot combustion.

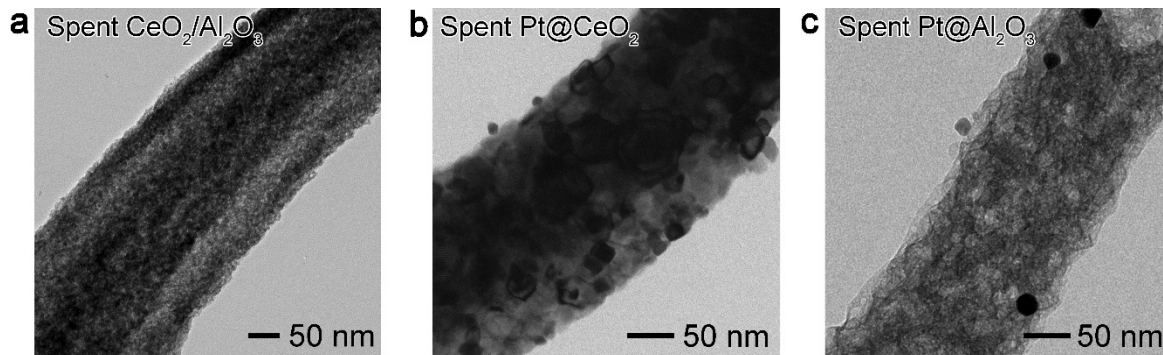

**Fig. S22** TEM images of (a) CeO<sub>2</sub>/Al<sub>2</sub>O<sub>3</sub> fibril-in-tubes, (b) Pt@CeO<sub>2</sub> nanofibers, and (c) Pt@Al<sub>2</sub>O<sub>3</sub> nanofibers after soot combustion for 3 cycles.

**Table S1.** EDX results of collected at 5 randomly selected positions in Pt@CeO<sub>2</sub>/Al<sub>2</sub>O<sub>3</sub> which was aged at 500 °C for 2 h.

| Position | Element | Family | Atomic fraction (at%) | Mass fraction (wt%) | Fit error (%) | Atomic ratio of Ce/Al |
|----------|---------|--------|-----------------------|---------------------|---------------|-----------------------|
| 1        | O       | K      | 64.77                 | 24.57               | 1.62          | 1.24                  |
|          | Al      | K      | 15.61                 | 9.98                | 1.06          |                       |
|          | Ce      | L      | 19.43                 | 64.54               | 0.09          |                       |
|          | Pt      | L      | 0.19                  | 0.90                | 2.84          |                       |
| 2        | O       | K      | 80.39                 | 39.81               | 1.36          | 1.71                  |
|          | Al      | K      | 7.17                  | 5.99                | 1.30          |                       |
|          | Ce      | L      | 12.28                 | 53.27               | 0.10          |                       |
|          | Pt      | L      | 0.15                  | 0.92                | 1.75          |                       |
| 3        | O       | K      | 71.26                 | 31.45               | 1.73          | 1.08                  |
|          | Al      | K      | 13.73                 | 10.22               | 1.02          |                       |
|          | Ce      | L      | 14.84                 | 57.35               | 0.07          |                       |
|          | Pt      | L      | 0.18                  | 0.98                | 1.59          |                       |
| 4        | O       | K      | 81.99                 | 46.24               | 0.88          | 1.00                  |
|          | Al      | K      | 8.91                  | 8.47                | 1.07          |                       |
|          | Ce      | L      | 8.92                  | 44.07               | 0.14          |                       |
|          | Pt      | L      | 0.18                  | 1.22                | 2.11          |                       |
| 5        | O       | K      | 78.66                 | 39.11               | 0.73          | 1.30                  |
|          | Al      | K      | 9.19                  | 7.70                | 0.37          |                       |
|          | Ce      | L      | 11.98                 | 52.17               | 0.10          |                       |
|          | Pt      | L      | 0.17                  | 1.01                | 1.90          |                       |



**Table S2.** The catalytic activity of Pt@CeO<sub>2</sub>/Al<sub>2</sub>O<sub>3</sub> fibril-in-tubes, Pt@CeO<sub>2</sub>, Pt@Al<sub>2</sub>O<sub>3</sub>, and CeO<sub>2</sub>/Al<sub>2</sub>O<sub>3</sub> for soot combustion under loose contact, along with the comparison to recently reported catalysts.

| Catalyst                                            | $T_{10}$<br>(°C) | $T_{50}$<br>(°C) | $T_{90}$<br>(°C) | Gas flow<br>rate<br>(mL/min) | Catalyst<br>dosage<br>(wt%) | Soot<br>dosage<br>(wt%) | Ramping<br>rate<br>(°C/min) | Reference |
|-----------------------------------------------------|------------------|------------------|------------------|------------------------------|-----------------------------|-------------------------|-----------------------------|-----------|
| CeO <sub>2</sub> /Al <sub>2</sub> O <sub>3</sub>    | 258              | 533              | 607              | 100                          | 90.0                        | 10.0                    | 10.0                        | This work |
| Pt@CeO <sub>2</sub> /Al <sub>2</sub> O <sub>3</sub> | 247              | 480              | 518              | 100                          | 90.0                        | 10.0                    | 10.0                        | This work |
| Pt@CeO <sub>2</sub>                                 | 356              | 520              | 563              | 100                          | 90.0                        | 10.0                    | 10.0                        | This work |
| Pt@Al <sub>2</sub> O <sub>3</sub>                   | 153              | 522              | 572              | 100                          | 90.0                        | 10.0                    | 10.0                        | This work |
| Soot (Printex-U)                                    | 501              | 587              | 672              | 100                          | 0                           | 100                     | 10.0                        | This work |
| CeO <sub>2</sub> -Ag/P25                            | ~390             | ~514             | ~600             | 60.0                         | 90.9                        | 9.09                    | 5.00                        | 1         |
| SmMn <sub>2</sub> O <sub>5</sub>                    | 471              | 508              | 545              | 150                          | 83.3                        | 16.7                    | 2.00                        | 2         |
| CeO <sub>2</sub>                                    | ~430             | 540              | ~600             | 100                          | 90.9                        | 9.09                    | 5.00                        | 3         |
| Au/TiO <sub>2</sub>                                 | ~410             | ~480             | ~546             | 100                          | 83.3                        | 16.7                    | 2.00                        | 4         |
| CoAlO                                               | 440              | 533              | NA               | 150                          | 95.2                        | 4.76                    | 5.00                        | 5         |
| Ag@CoAlO                                            | 352              | 461              | NA               | 150                          | 95.2                        | 4.76                    | 5.00                        | 5         |

## References

- 1 M. J. Kim, G. H. Han, S. H. Lee, H. W. Jung, J. W. Choung, C. H. Kim and K. Y. Lee, *J. Hazard. Mater.*, 2020, **384**, 121341.

- 2 Y. Chen, G. Shen, Y. Lang, R. Chen, L. Jia, J. Yue, M. Shen, C. Du and B. Shan, *J. Catal.*, 2020, **84**, 96–105.
- 3 J. H. Lee, S. H. Lee, J. W. Choung, C. H. Kim and K. Y. Lee, *Appl. Catal. B Environ.*, 2019, **246**, 356–366.
- 4 N. S. Portillo-Vélez and R. Zanella, *Chem. Eng. J.*, 2020, **385**, 123848.
- 5 W. Ren, T. Ding, Y. Yang, L. Xing, Q. Cheng, D. Zhao, Z. Zhang, Q. Li, J. Zhang, L. Zheng, Z. Jiang and X. Li, *ACS Catal.*, 2019, **9**, 8772–8784.
